# Supplementary material
Source: publisher site journal article supplement (https://www.dovepress.com/get_supplementary_file.php?f=253099.docx)
Supplement: Supplementary file 1 [file get_supplementary_file.php]

**Supplementary Table 1**. Odds ratio for MetS among low elevation residents according to health-related lifestyle factors

|  | **Men** | | **Women** | |
| --- | --- | --- | --- | --- |
|  | Yesa (95% CI) | No (95% CI) | Yesa (95% CI) | No (95% CI) |
| **Current alcohol consumption** |  |  |  |  |
| Increased waist circumference | **2.10 (1.38-3.19)** | **1.59 (1.01-2.76)** | 1.01 (0.61-1.66) | **1.37 (1.01-1.84)** |
| Elevated blood pressure | 0.86 (0.52-1.42) | 1.11 (0.63-1.96) | 0.54 (0.29-1.01) | 1.22 (0.80-1.86) |
| Reduced HDL cholesterol | 0.87 (0.58-1.31) | 0.81(0.49-1.33) | 1.45 (0.92-2.26) | 0.98 (0.74-1.30) |
| Elevated triglycerides | 0.94 (0.62-1.42) | 0.61 (0.36-1.02) | 0.93 (0.54-1.58) | 0.95 (0.69-1.30) |
| Elevated fasting glucose | **3.15 (1.77-5.59)** | 1.84 (0.94-3.59) | **2.62 (1.35-5.09)** | **1.84 (1.26-2.70)** |
| Metabolic syndrome | **1.56 (1.13-2.21)** | 1.05 (0.81-1.81) | 1.19 (0.71-1.99) | 1.13 (0.82-1.57) |
|  |  |  |  |  |
| **Current smoking** |  |  |  |  |
| Increased waist circumference | **1.86 (1.12-3.08)** | **1.72 (1.18-2.52)** | 1.56 (0.48-5.09) | **1.44 (1.12-1.85)** |
| Elevated blood pressure | 0.90 (0.50-1.62) | 1.09 (0.71-1.65) | 0.85 (0.15-4.98) | 1.20 (0.85-1.67) |
| Reduced HDL cholesterol | 1.36 (0.81-2.29) | 0.86 (0.59-1.25) | 1.46 (0.42-5.12) | 1.06 (0.84-1.34) |
| Elevated triglycerides | 0.86 (0.52-1.41) | 0.95 (0.66-1.38) | 0.46 (0.18-1.17) | 1.11 (0.86-1.44) |
| Elevated fasting glucose | 2.17 (0.93-5.04) | 0.56 (0.43-1.31) | **3.26 (1.09-9.69)** | **1.93 (1.39-2.66)** |
| Metabolic syndrome | **1.65 (1.11-2.47)** | 1.27 (0.93-1.75) | 0.92 (0.46-1.84) | 1.08 (0.91-1.29) |
|  |  |  |  |  |
| **Physical activity** |  |  |  |  |
| Increased waist circumference | 1.21 (0.71-2.08) | **2.05 (1.22-3.45)** | 0.96 (0.45-2.04) | **1.38 (1.05-1.83)** |
| Elevated blood pressure | 1.16 (0.66-2.02) | 0.77 (0.49-1.20) | 0.47 (0.16-1.41) | 1.20 (0.83-1.73) |
| Reduced HDL cholesterol | 0.81 (0.50-1.29) | 0.93 (0.61-1.41) | 0.86 (0.49-1.50) | 1.06 (0.82-1.36) |
| Elevated triglycerides | 0.76 (0.47-1.23) | 0.92 (0.61-1.39) | 0.51 (0.26-1.02) | 1.11 (0.83-1.47) |
| Elevated fasting glucose | 1.30 (0.99-3.66) | **1.91 (1.12-3.27)** | 0.71 (0.30-1.71) | **2.34 (1.68-3.27)** |
| Metabolic syndrome | 1.39 (0.96-2.01) | **1.47 (1.05-2.05)** | 0.76 (0.49-1.18) | 1.14 (0.95-1.36) |
|  |  |  |  |  |
|  | High a (95% CI) | Low (95% CI) | High a (95% CI) | Low (95% CI) |
| **% EER** |  |  |  |  |
| Increased waist circumference | 2.00 (0.82-4.88) | 1.46 (0.99-2.15) | 1.46 (0.99-2.17) | 1.19 (0.83-1.70) |
| Elevated blood pressure | 0.82 (0.33-2.03) | 1.31 (0.74-2.34) | 1.31 (0.74-2.34) | 0.93 (0.60-1.44) |
| Reduced HDL cholesterol | 1.07 (0.52-2.22) | 1.00 (0.70-1.43) | 1.01 (0.71-1.44) | 1.05 (0.77-1.43) |
| Elevated triglycerides | 1.03 (0.47-2.24) | 1.05 (0.68-1.62) | 1.05 (0.68-1.62) | 0.96 (0.70-1.33) |
| Elevated fasting glucose | 0.94 (0.36-2.46) | **2.82 (1.78-4.45)** | **3.86 (2.10-6.92)** | **1.52 (1.01-2.27)** |
| Metabolic syndrome | 1.34 (0.71-2.90) | 1.10 (0.76-1.60) | 1.21 (0.91-1.61) | 1.03 (0.84-1.26) |

Bold values indicate the statistical significance.

ORs were calculated based on high elevation residents (reference).

a Yes or No for current alcohol consumption, current smoking, and physical activity; high (>100%) or low (≤100%) for EER

All values accounted for the complex sampling design effect of the national surveys using PROC SURVEY procedure. A multiple logistic regression analysis was performed after adjusting for ethnicity, family economic status, education level, BMI (except for the model of waist circumference), physical activity, current alcohol consumption, current smoking and total energy intake.

**Abbreviations:** CI, confidence interval; HDL high-density lipoprotein
